# Supplementary material
Source: PubMed Central journal article supplement (PMC5215264)
Supplement: koni-05-12-1248327-s001.pdf [file koni-05-12-1248327-s001.pdf]

# **Peripheral blood Th9 cells are a possible pharmacodynamic biomarker of nivolumab treatment efficacy in metastatic melanoma patients**

## **Supplemental information**

### **Material and methods**

#### **Tumor proliferation assay**

B16 melanoma cells were cultured in complete DMEM supplemented with 10% FCS/10 mM Hepes/100 units/ml penicillin/100 mg/ml streptomycin/2 mM L-glutamine (Invitrogen) at 5% CO<sub>2</sub> for 24 h with or without 10 ng/mL of recombinant murine IL-9 (BioLegend). Finally, the number of harvested cells was counted using a hemacytometer.

#### **IL-9 stimulation assay of human melanoma cell lines**

Human melanoma cell lines, A375 and SK-MEK-28, were commercially purchased from ECACC or ATCC. They were cultured in complete DMEM supplemented with 10% FCS/10 mM Hepes/100 units/ml penicillin/100 mg/ml streptomycin/2 mM L-glutamine (Invitrogen) at 5% CO<sub>2</sub> for 24 h with or without 10 ng/mL of recombinant murine IL-9 (BioLegend). The number of harvested cells was counted using a hemacytometer. The following fluorescent-labeled monoclonal antibodies were used for surface staining of these melanoma cells: HLA-ABC-PE (BioLegend), IL-9R-PE (BioLegend), PD-L1-PE/Cy7 (BioLegend), HLA-DR-APC (eBioscience). After surface staining, the cells were permeabilized and then fixed

according to the manufacturer's instructions using the Cytofix/Cytoperm kit (BD Biosciences).

Acquisition was performed by eight-color flow cytometry using FACS Fortessa with FACS Diva software (both from BD Biosciences). The compensation control was performed with BD CompBeads (BD Biosciences). FlowJo software (Tree Star) was used for analysis.

## Supplemental Table 1

### Laboratory data of the patients with nivolumab treatment.

Res: responders, Non: non-responders, SD: standard deviation, WBC: white blood cells,  
LDH: lactate dehydrogenase

|             | Unit      | Before |       |       |       |                   | After |       |       |       |                   |
|-------------|-----------|--------|-------|-------|-------|-------------------|-------|-------|-------|-------|-------------------|
|             |           | Res    | SD    | Non   | SD    | <i>P</i><br>value | Res   | SD    | Non   | SD    | <i>P</i><br>value |
| Age         |           | 69.5   | 10.2  | 65    | 12.2  | 0.129             | -     | -     | -     | -     | -                 |
| WBC         | / $\mu$ L | 4579   | 930.7 | 5206  | 1937  | 0.309             | 5326  | 2068  | 6990  | 4349  | 0.23              |
| Neutrophils | / $\mu$ L | 2950   | 835.4 | 3549  | 1805  | 0.296             | 3542  | 1987  | 5231  | 4388  | 0.227             |
| Lymphocytes | / $\mu$ L | 1207   | 309.7 | 1114  | 431.6 | 0.512             | 1294  | 470.4 | 1045  | 506.5 | 0.158             |
| Monocytes   | / $\mu$ L | 288    | 62.31 | 355.7 | 135.7 | 0.119             | 355.1 | 164.4 | 388.1 | 218.3 | 0.648             |
| Eosinophils | / $\mu$ L | 101.9  | 75.32 | 132.6 | 126   | 0.451             | 108.5 | 80.33 | 220.4 | 207.6 | 0.09              |
| Basophils   | / $\mu$ L | 32.44  | 23.21 | 27.53 | 21.66 | 0.524             | 29.27 | 24.62 | 31.35 | 24.18 | 0.806             |
| LDH         | IU/L      | 283.8  | 163   | 343.6 | 391.8 | 0.627             | 297.7 | 265.9 | 427.1 | 513.8 | 0.43              |

**Supplemental Table 2****The size of melanoma lesion (length × width, mm<sup>2</sup>) of Braf/Pten mutation mice.**

|            | Day 0 | Day 5 | Day 10 | Day 15 |
|------------|-------|-------|--------|--------|
| Control #1 | 10    | 12    | 14     | 16     |
| #2         | 25    | 30    | 36     | 40     |
| #3         | 6     | 8     | 10     | 12     |
| αIL-9 #1   | 10    | 24    | 26     | 32     |
| #2         | 12    | 24    | 36     | 72     |
| #3         | 49    | 104   | 120    | 182    |
| #4         | 45    | 72    | 100    | 131    |

### Supplemental Table 3

Clinical information of the patients enrolled in the immunohistochemistry of IL-9 and CD8.

| #  | Age | Sex | TNM       | Stage | Type    |
|----|-----|-----|-----------|-------|---------|
| 1  | 52  | F   | pT2bN1aM0 | IIIB  | SSM     |
| 2  | 68  | M   | pT2N0M0   | IB    | ALM     |
| 3  | 48  | M   | pT4aN1aM0 | IIIA  | SSM     |
| 4  | 78  | M   | T4bN3M0   | IIIC  | ALM     |
| 5  | 71  | M   | pT2aNX    | IB    | SSM     |
| 6  | 73  | F   | pT1aN0M0  | IA    | ALM     |
| 7  | 90  | M   | pT4bNxM0  | IIC   | ALM     |
| 8  | 69  | F   | pT4bN0M0  | IIC   | Mucosal |
| 9  | 79  | M   | T4bN3M0   | IIIC  | ALM     |
| 10 | 89  | M   | pT4bN3M0  | IIIC  | LMM     |

M: male, F: female, ALM: acral lentiginous melanoma, SSM: superficial spreading melanoma, LMM: lentigo maligna melanoma

# Supplemental Figure 1

A

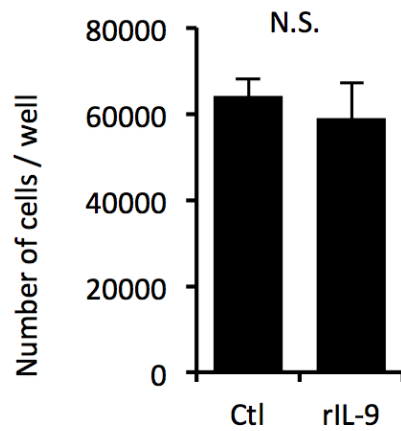

B16 melanoma cells were cultured in the presence or absence of rIL-9. No significant difference was observed in the proliferation of the cells, irrespective of the presence of rIL-9.

## Supplemental Figure 2

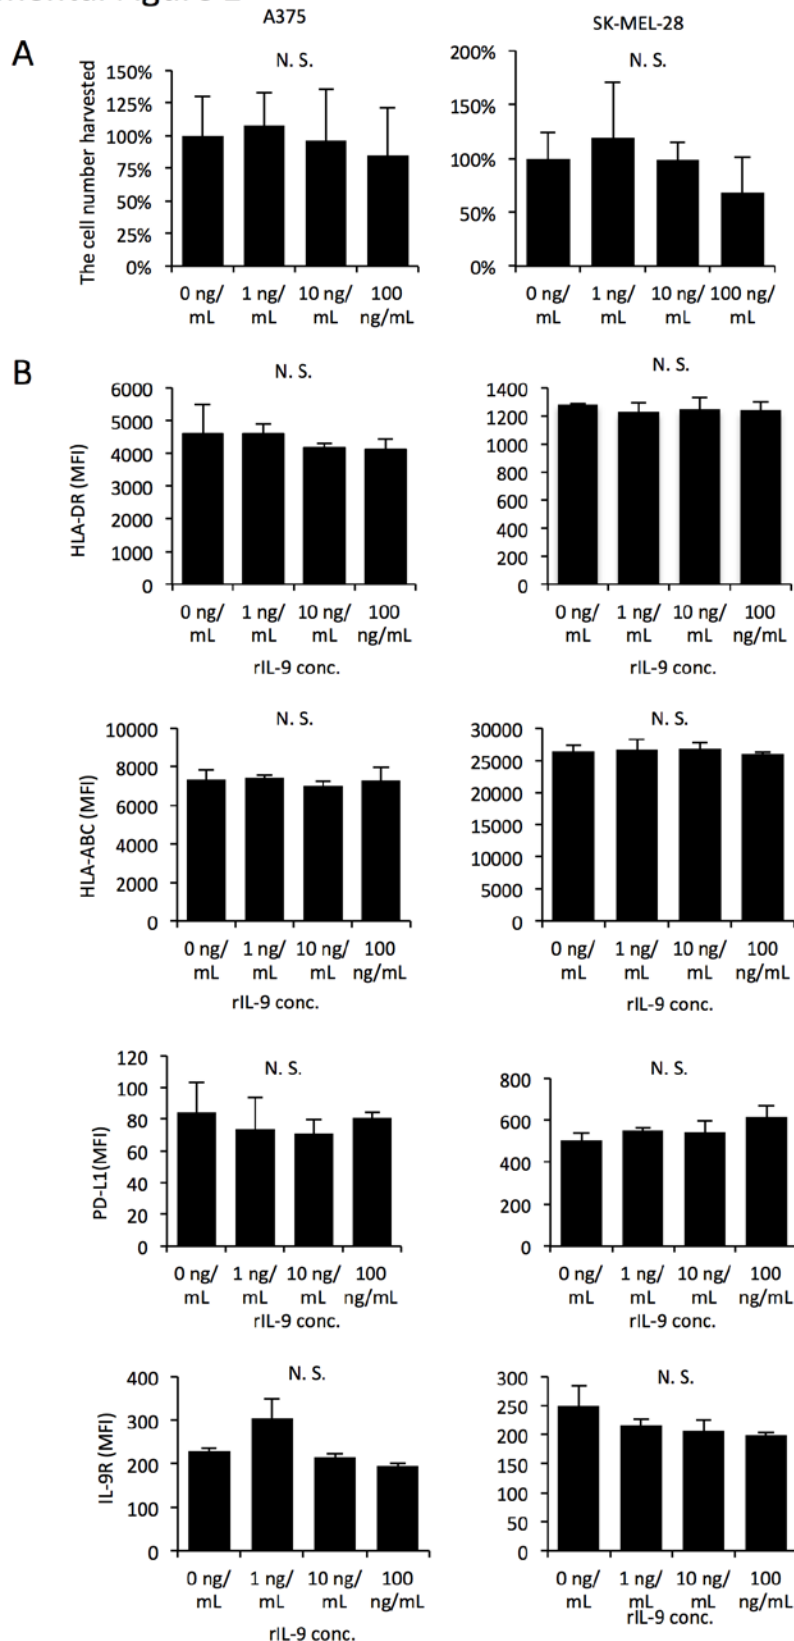

Human melanoma cell lines (A375 and SK-MEL-28) were cultured in the presence or absence of rIL-9.

(A) The cell number after 24 h culture was shown as % of that of control group.

(B) Using flowcytometry, the expression levels of HLA-DR, HLA-ABC, PD-L1, IL-9R were quantified by measurement of each mean fluorescent intensity. No significant difference was observed, irrespective of the presence of rIL-9.

The bar graphs show the representative data.

# Supplemental Figure 3

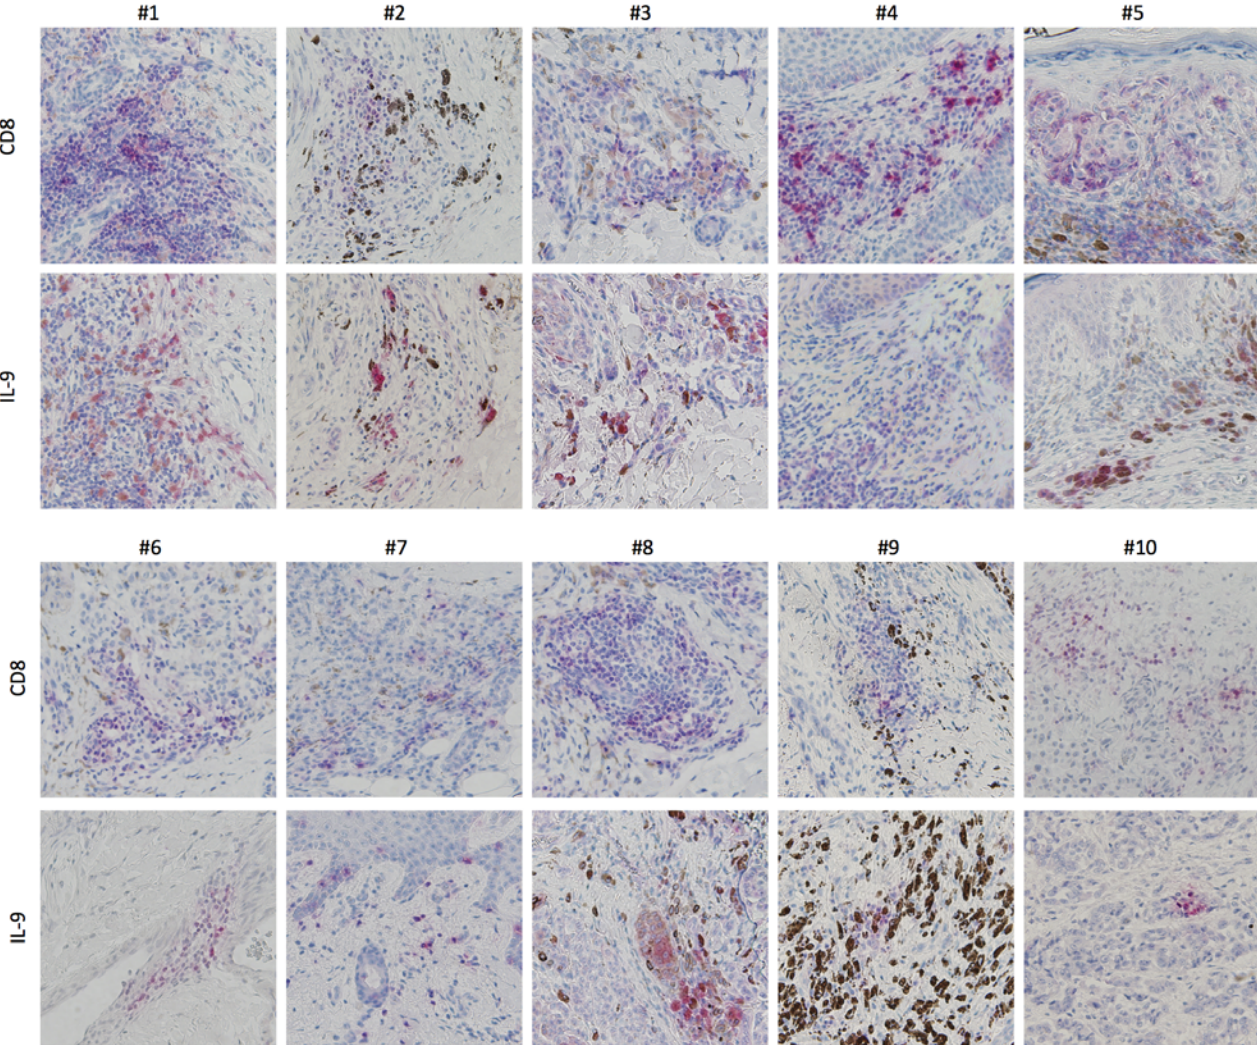

CD8 (upper) and IL-9 (lower) expression in human melanoma tissues from 10 melanoma patients (immunohistochemistry).
